# Supplementary material
Source: Springer Nature journal article supplement (https://www.springermedizin.de/resource/supplementary/12931_2012_1242_MOESM3_ESM.pdf/9425858)

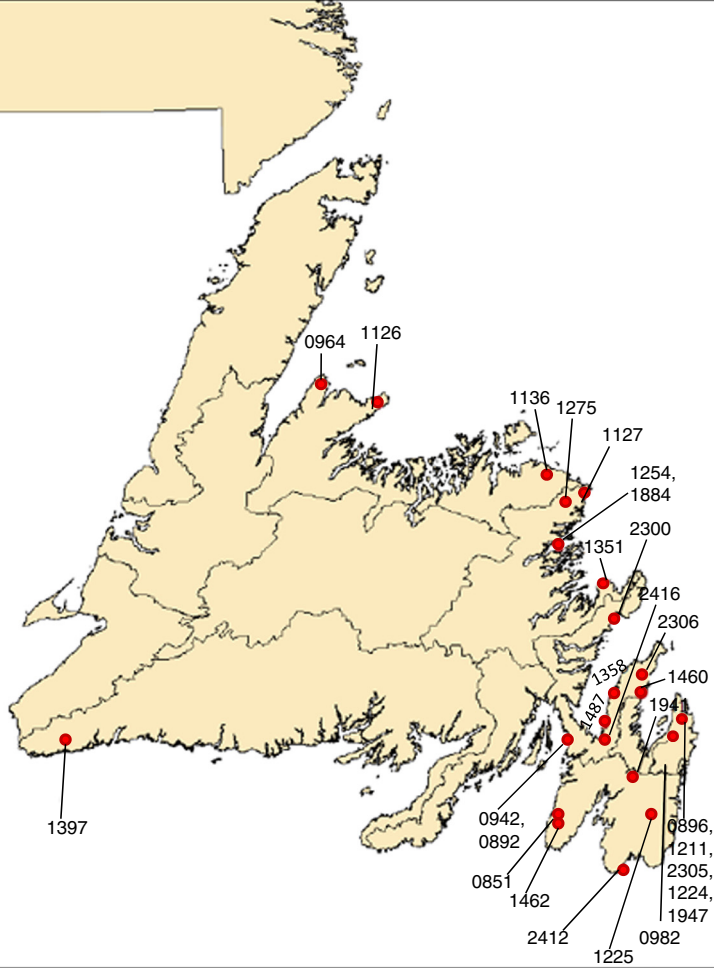

Supplement: MOESM3 [file 9425858]
